# Supplementary material for: Non-human primate to human immunobridging demonstrates a protective effect of Ad26.ZEBOV, MVA-BN-Filo vaccine against Ebola
Source: PubMed Central journal article supplement (PMC9712521; doi:10.1038/s41541-022-00564-z), 2022-11-30
Supplement: 41541_2022_564_MOESM2_ESM.pdf [file 41541_2022_564_MOESM2_ESM.pdf]

## **SUPPLEMENTARY APPENDIX**

- 1. Supplementary Notes**
- 2. Supplementary Tables and Figures**
- 3. Supplementary References**

## 1. Supplementary Notes

### RESULTS

#### *Pre-specified sensitivity analysis excluding the participants of study EBL3001*

Several pre-specified subgroup sensitivity analyses were performed to investigate the robustness of the primary immunobridging analysis. First, EBL3001 was the only study performed in a country previously affected by an EBOV outbreak (Sierra Leone).<sup>1</sup> Although previous EVD diagnosis was a study exclusion criterion and no active cases of EVD were reported in the area at the time of the study conduct, a sensitivity analysis excluding the participants of EBL3001 was pre-planned to assess the possible effect of pre-existing immunity to EBOV on the immunobridging result. However, in line with the lower EBOV GP-specific binding antibody responses in study EBL3001 in Sierra Leone (Supplementary Table 2), excluding EBL3001 resulted in a higher mean predicted survival probability of 62.2% in comparison to the primary analysis result of 53.4%, demonstrating that the primary immunobridging result was not driven upwards by inclusion of potentially pre-exposed participants (Fig. 2).

#### *Pre-specified sensitivity analysis by baseline FANG ELISA level*

Across the clinical studies, 4.4% to 31.4% of participants tested positive in the EBOV GP FANG ELISA prior to vaccination, except for study EBL3001, where 59.3% of baseline positivity was observed (Supplementary Table 7).<sup>2-5</sup> Since it is currently unclear whether the observed positivity at baseline is truly reflective of previous natural EBOV infection or due to assay cross-reactivity, since it was also observed in countries that never experienced an Ebola outbreak (including France, UK, and USA), a pre-specified sensitivity analysis stratified per baseline EBOV GP FANG ELISA level (<LLOQ, LLOQ-100, >100-1000, >1000 EU/mL) was performed to assess the potential impact of baseline positivity on the primary immunobridging

result. Most participants (N=565/764; Supplementary Table 1) tested negative prior to vaccination (<LLOQ), and this subgroup displayed a mean predicted survival probability of 57.0%, consistent with the primary immunobridging result (53.4%; Fig. 2). The mean predicted survival probability was 40.9% and 41.5% for the subgroups with baseline ELISA values between LLOQ to 100 EU/mL (N=87/756) and 100 to 1000 EU/mL (N=90/756; Fig. 2 and Supplementary Table 1), respectively, while a very small subgroup with a baseline ELISA value above 1000 EU/mL (N=14/756) had a mean predicted survival probability of 59.6%, consistent with the primary result (53.4%; Fig. 2 and Supplementary Table 1). Breakdown of the distribution of participants per study showed that this analysis was disproportionately influenced by the large number of EBL3001 study participants (59/87, 58/90, and 11/14) in all strata  $\geq$ LLOQ. In the EBL3001 study, performed in Sierra Leone, EBOV GP-specific antibody responses at baseline were overall lower compared to the four other clinical studies (Supplementary Table 8). A post-hoc subanalysis restricted to the EBL3001 participants demonstrated that the strata with baseline ELISA values <LLOQ, LLOQ to 100 EU/mL, and >100 to 1000 EU/mL showed a mean predicted survival probability fully consistent with the overall EBL3001 result (point estimates of 29.3%, 31.9%, and 28.6% in comparison to 30.9%, respectively) (Supplementary Fig. 1). Five percent of the Sierra Leonean participants (N=11/215) had a baseline ELISA value >1000 EU/mL and, in line with the observed higher antibody GMC post-vaccination, this small subgroup tended to have a higher mean predicted survival probability (52.9%); however, the 95% CI overlap across all strata. This sensitivity analysis indicates that the observed baseline positivity did not impact the immunobridging result. Although a minor percentage of participants started with a higher baseline ELISA value, the vaccine protective effect in this subgroup did not appear to be fundamentally different from the groups with no or lower baseline positivity.

*Pre-specified sensitivity analysis for healthy adults using the logistic model based on all available NHP data*

The pre-specified sensitivity analyses for the healthy adults also included an immunobridging analysis using a logistic model based on the NHP dataset that contained all available NHP data, including data from NHPs vaccinated with other vaccine regimens and/or intervals, with the logistic model being defined as penalized logistic regression models using Firth's method. The outcome of this sensitivity analysis was consistent with the primary immunobridging analysis result (Supplementary Table 6).

*Immunobridging analyses based on the FAS*

For the healthy adults, the immunobridging analysis based on the FAS (N=899) demonstrated a mean predicted survival probability of 55.1% (95% CI, 39.1-68.7), consistent with the primary immunobridging analysis based on the PPI set. The corresponding pre-specified sensitivity analyses are summarized in Supplementary Fig. 2.

For the specific subpopulations of healthy adults aged >50 years, PLWH, and children aged  $\geq 1$  year, separate immunobridging analyses were also performed on the FAS (Supplementary Table 4), with no apparent differences between PPI and FAS.

## 2. Supplementary Tables and Figures

**Supplementary Figure 1. Mean Predicted Survival Probability and 95% CI – Subgroup Analysis Restricted to Study EBL3001 (Sierra Leone) by Baseline EBOV GP ELISA Level; PPI Analysis Set.**

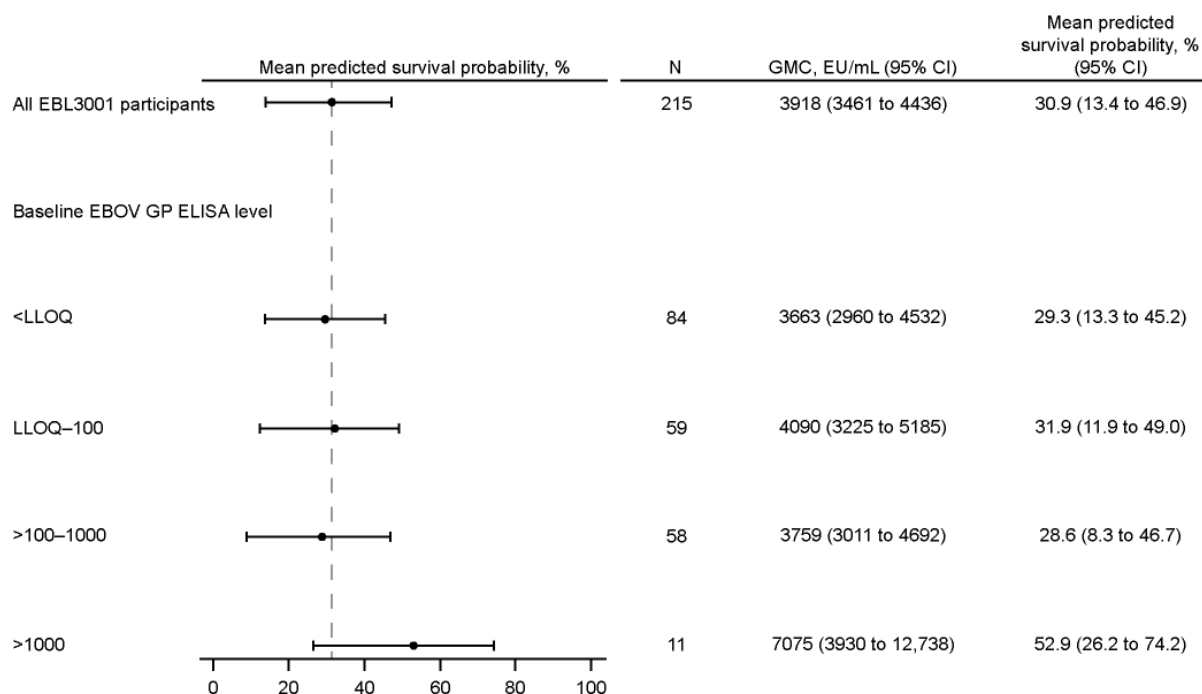

Immunobridging analysis was based on the EBL3001 clinical studies in healthy adults (aged  $\geq 18$  years) using a logistic regression model based on NHP data from the Ad26.ZEBOV, MVA-BN-Filo vaccine regimen in a 56-day interval. Mean predicted survival probability and the 95% bootstrapped CI are reported.

CI = confidence interval; EBOV = Ebola virus; EU = enzyme-linked immunosorbent assay units; GMC = geometric mean concentration; GP = glycoprotein; LLOQ = lower limit of quantification (36.11 EU/mL); N = number of participants with data; NHP = non-human primate; PPI = per-protocol immunogenicity; vertical dashed line = mean predicted survival probability from post-hoc subanalysis including all EBL3001 (Sierra Leone) participants.

## Supplementary Figure 2. Forest Plot of Mean Predicted Survival Probability and 95% CI – Pre-specified Subgroup Analyses by Baseline EBOV GP Binding Antibody

### Concentration, Sex, Age Category, Race, and Region; FAS.

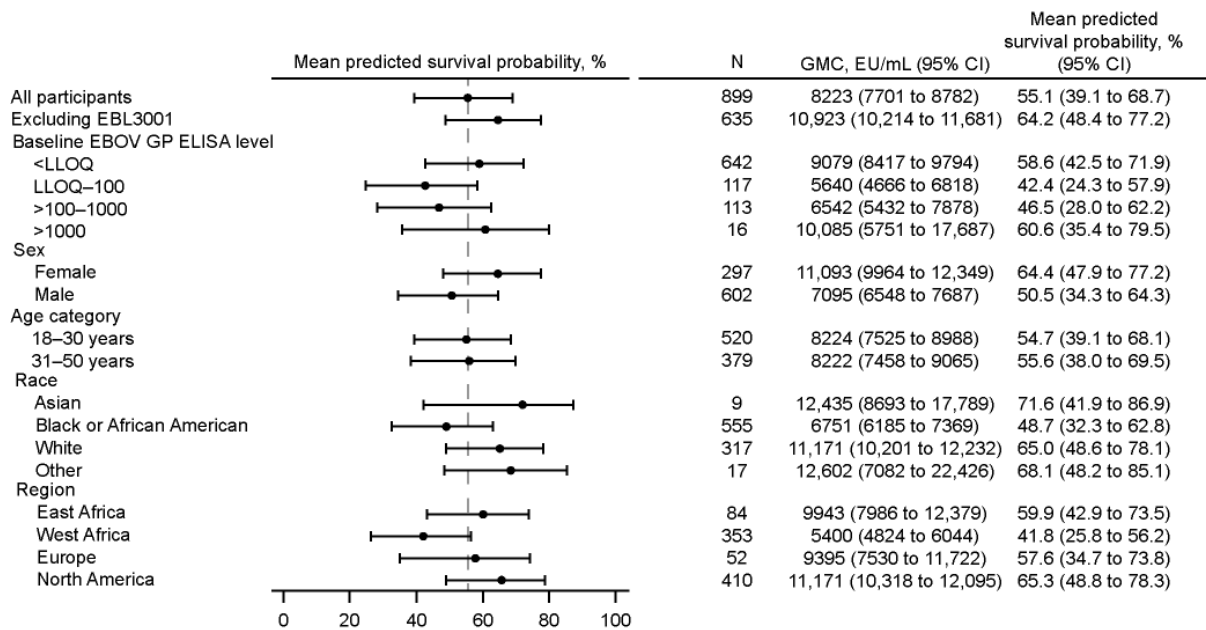

This analysis was based on the pooled data of five clinical studies (EBL2001, EBL2002, EBL3001, EBL3002, and EBL3003) in healthy adults (aged 18-50 years) using a logistic regression model based on NHP data from the Ad26.ZEBOV, MVA-BN-Filo vaccine regimen in a 56-day interval. Mean predicted survival probability and the 95% bootstrapped CI are reported.

CI = confidence interval; EBOV = Ebola virus; EU = enzyme-linked immunosorbent assay units; FAS = full analysis set; GMC = geometric mean concentration; GP = glycoprotein; LLOQ = lower limit of quantification (36.11 EU/mL); N = number of participants with data; NHP = non-human primate; vertical dashed line = mean predicted survival probability from primary analysis including all participants.

**Supplementary Table 1. Summary of Baseline and Demographic Characteristics for Adults (18-50 Years of Age) in the Primary Immunobridging Analysis; PPI Analysis Set**

|                         | N=764       |
|-------------------------|-------------|
| <b>Study, No. (%)</b>   |             |
| VAC52150EBL2001         | 45 (5.9)    |
| VAC52150EBL2002         | 115 (15.1)  |
| VAC52150EBL3001         | 215 (28.1)  |
| VAC52150EBL3002         | 135 (17.7)  |
| VAC52150EBL3003         | 254 (33.2)  |
| <b>Country, No. (%)</b> |             |
| Burkina Faso            | 35 (4.6)    |
| Côte d'Ivoire           | 17 (2.2)    |
| France                  | 14 (1.8)    |
| Kenya                   | 15 (2.0)    |
| Sierra Leone            | 215 (28.1)  |
| Uganda                  | 48 (6.3)    |
| UK                      | 31 (4.1)    |
| USA                     | 389 (50.9)  |
| <b>Age, Years</b>       |             |
| Mean (SD)               | 30.6 (9.41) |
| Median                  | 28.0        |
| Q1; Q3                  | 22.0; 38.0  |
| Min; Max                | 18; 50      |
| <b>Height, cm</b>       |             |

|                              |                |
|------------------------------|----------------|
| Mean (SD)                    | 170.62 (9.198) |
| Median                       | 170.20         |
| Q1; Q3                       | 165.00; 176.85 |
| Min; Max                     | 139.0; 198.1   |
| <b>Weight, kg</b>            |                |
| Mean (SD)                    | 74.39 (17.163) |
| Median                       | 70.60          |
| Q1; Q3                       | 61.40; 85.95   |
| Min; Max                     | 43.0; 131.5    |
| <b>BMI, kg/m<sup>2</sup></b> |                |
| Mean (SD)                    | 25.48 (5.121)  |
| Median                       | 24.30          |
| Q1; Q3                       | 21.60; 28.60   |
| Min; Max                     | 15.4; 41.5     |
| <b>Sex, No. (%)</b>          |                |
| Female                       | 267 (34.9)     |
| Male                         | 497 (65.1)     |
| <b>Race, No. (%)</b>         |                |
| Asian                        | 8 (1.0)        |
| Black or African American    | 444 (58.1)     |
| White                        | 297 (38.9)     |
| Other                        | 14 (1.8)       |
| Not Reported                 | 1 (0.1)        |
| <b>Ethnicity, No. (%)</b>    |                |
| Hispanic or Latino           | 59 (7.7)       |



|                                     |             |
|-------------------------------------|-------------|
| Not Hispanic or Latino              | 702 (91.9)  |
| Unknown                             | 2 (0.3)     |
| Not Reported                        | 1 (0.1)     |
| <b>Region, No. (%)</b>              |             |
| East Africa                         | 63 (8.2)    |
| West Africa                         | 267 (34.9)  |
| Europe                              | 45 (5.9)    |
| North America                       | 389 (50.9)  |
| <b>Baseline EBOV GP ELISA Level</b> |             |
| <b>(EU/mL), No. (%)</b>             |             |
| <LLOQ                               | 565 (74.7)* |
| LLOQ to 100                         | 87 (11.5)*  |
| >100 to 1000                        | 90 (11.9)*  |
| >1000                               | 14 (1.9)*   |

BMI = body mass index; EBOV = Ebola virus; EU = enzyme-linked immunosorbent assay units; GP = glycoprotein; LLOQ = lower limit of quantification (36.11 EU/mL); max = maximum; min = minimum; N = number of participants with data; PPI = per-protocol immunogenicity; Q1 = 25% percentile; Q3 = 75% percentile; SD = standard deviation; UK = United Kingdom; USA = United States of America.

\*N=756 (total includes only participants with data at both baseline and 21 days post-Dose 2).

**Supplementary Table 2. Overview of EBOV GP-specific Antibody Responses 21 Days Post-Dose 2 (ELISA, EU/mL) for the Ad26.ZEBOV, MVA-BN-Filo Regimen With a 56-day Interval in the Five Phase 2/3 Clinical Studies – Healthy Adults (Aged 18-50 years)**

|                 | Analysis Set | Studies (Countries) |                              |                |                  |                    | Overall (All Studies) |
|-----------------|--------------|---------------------|------------------------------|----------------|------------------|--------------------|-----------------------|
|                 |              | EBL2001 (FRA, UK)   | EBL2002 (BFA, CIV, KEN, UGA) | EBL3001 (SL)   | EBL3002 (USA)    | EBL3003 (USA)      |                       |
| N               | PPI          | 45                  | 115                          | 215            | 135              | 254                | 764                   |
| GMC             |              | 8927                | 8109                         | 3918           | 11,054           | 11,052             | 7781                  |
| (95% CI)        |              | (7136 to 11,168)    | (6872 to 9568)               | (3461 to 4436) | (9673 to 12,633) | (9959 to 12,265)   | (7265 to 8333)        |
| No./N* (% Resp) |              | 45/45 (100.0)       | 113/113 (100.0)              | 208/212 (98.1) | 135/135 (100.0)  | 251/251 (100.0)    | 752/756 (99.5)        |
| N               | FAS          | 52                  | 173                          | 264            | 144              | 266                | 899                   |
| GMC             |              | 9395                | 10836                        | 4155           | 11274            | 11116              | 8223                  |
| (95% CI)        |              | (7530 to 11,722)    | (9367 to 12,535)             | (3683 to 4687) | (9928 to 12,803) | (10,040 to 12,308) | (7701 to 8782)        |
| No./N* (% Resp) |              | 52/52 (100.0)       | 169/169 (100.0)              | 255/260 (98.1) | 144/144 (100.0)  | 263/263 (100.0)    | 883/888 (99.4)        |

The immunogenicity data based on the primary PPI analysis set demonstrated no notable differences compared to the FAS set.

BFA = Burkina Faso; CI = confidence interval; CIV = Côte d'Ivoire; EBOV = Ebola virus; EU = enzyme-linked immunosorbent assay units; FAS = full analysis set; FRA = France; GMC = geometric mean concentration; GP = glycoprotein; KEN = Kenya; LLOQ = lower limit of quantification (36.11 EU/mL); N = number of participants with data at 21 days post-Dose 2; N\* = number of participants with data at both baseline and 21 days post-Dose 2; PPI = per-protocol immunogenicity analysis set; SL = Sierra Leone; UGA = Uganda; UK = United Kingdom; USA = United States of America; % resp = percentage of participants with post-vaccination antibody concentrations >2.5-fold the LLOQ in baseline negative individuals or >2.5-fold the baseline value in baseline positive individuals.

**Supplementary Table 3. Overview of EBOV GP-specific Antibody Responses 21 Days Post-Dose 2 (ELISA, EU/mL) for the Ad26.ZEBOV, MVA-BN-Filo Regimen With a 56-day Interval for Healthy Adults Aged >50 Years, PLWH Aged 18 to 50 Years, and Children (Aged 1-17 Years)**

|                 | Analysis Set | Healthy Older Adults                                | PLWH                                        | Children                                       |
|-----------------|--------------|-----------------------------------------------------|---------------------------------------------|------------------------------------------------|
|                 |              | Aged >50 Years<br>(BFA, CIV, FRA, KEN, SL, UGA, UK) | Aged 18 to 50 Years<br>(BFA, CIV, KEN, UGA) | Aged 1 to 17 Years<br>(BFA, CIV, KEN, SL, UGA) |
| N               |              | 53                                                  | 59                                          | 487                                            |
| GMC             | PPI          | 7700                                                | 5283                                        | 13,509                                         |
| (95% CI)        |              | (6066 to 9775)                                      | (4094 to 6817)                              | (12,206 to 14,951)                             |
| No./N* (% Resp) |              | 50/51 (98.0)                                        | 58/58 (100.0)                               | 471/478 (98.5)                                 |
| N               |              | 69                                                  | 59                                          | 532                                            |
| GMC             | FAS          | 8901                                                | 5283                                        | 13,450                                         |

|                 | <b>Healthy Older Adults</b> |                                                               | <b>PLWH</b>                                        | <b>Children</b>                                       |
|-----------------|-----------------------------|---------------------------------------------------------------|----------------------------------------------------|-------------------------------------------------------|
|                 | <b>Analysis Set</b>         | <b>Aged &gt;50 Years</b><br>(BFA, CIV, FRA, KEN, SL, UGA, UK) | <b>Aged 18 to 50 Years</b><br>(BFA, CIV, KEN, UGA) | <b>Aged 1 to 17 Years</b><br>(BFA, CIV, KEN, SL, UGA) |
| (95% CI)        |                             | (7217 to 10977)                                               | (4094 to 6817)                                     | (12,194 to 14,836)                                    |
| No./N* (% Resp) |                             | 66/67 (98.5)                                                  | 58/58 (100.0)                                      | 514/522 (98.5)                                        |

The immunogenicity data based on the PPI demonstrated no notable differences compared to the FAS analysis set. Studies including older adults (>50 years): EBL2001, EBL2002, and EBL3001; study including PLWH: EBL2002; studies including children: EBL2002 and EBL3001.

BFA = Burkina Faso; CI = confidence interval; CIV = Côte d'Ivoire; EBOV = Ebola virus; EU = enzyme-linked immunosorbent assay units; FAS = full analysis set; FRA = France; GMC = geometric mean concentration; GP = glycoprotein; KEN = Kenya; LLOQ = lower limit of quantification (36.11 EU/mL); N = number of participants with data at 21 days post-Dose 2; N\* = number of participants with data at both baseline and 21 days post-Dose 2; PLWH = people living with human immunodeficiency virus; PPI = per-protocol immunogenicity analysis set; SL = Sierra Leone; UGA = Uganda; UK = United Kingdom; USA = United States of America; % resp = percentage of participants with post-vaccination antibody concentrations >2.5-fold the LLOQ in baseline negative individuals or >2.5-fold the baseline value in baseline positive individuals.

**Supplementary Table 4. Immunobridging Analysis for Healthy Adults Aged >50 Years, PLWH Aged 18 to 50 Years, and Children (Aged 1-17 Years) Using a Logistic Regression Model Based on Data From NHPs Vaccinated With the Ad26.ZEBOV, MVA-BN-Filo Vaccine Regimen in a 56-day Interval Based on the FAS**

|                                                         |                     |
|---------------------------------------------------------|---------------------|
| <b>Elderly Healthy Participants (Aged &gt;50 Years)</b> |                     |
| No. Participants Vaccinated                             | 69                  |
| Mean Predicted Survival Probability, % (95% CI)         | 57.8 (36.2 to 73.6) |
| <b>PLWH (Aged 18-50 Years)</b>                          |                     |
| No. Participants Vaccinated                             | 59                  |
| Mean Predicted Survival Probability, % (95% CI)         | 42.0 (22.4 to 58.9) |
| <b>Children (Aged 1-17 Years)</b>                       |                     |
| No. Participants Vaccinated                             | 532                 |
| Mean Predicted Survival Probability, % (95% CI)         | 69.8 (59.5 to 79.7) |
| <i>Children (Aged 12-17 Years)</i>                      |                     |

|                                                 |                     |
|-------------------------------------------------|---------------------|
| No. Participants Vaccinated                     | 194                 |
| Mean Predicted Survival Probability, % (95% CI) | 63.7 (49.7 to 76.0) |
| <b><i>Children (Aged 4-11 Years)</i></b>        |                     |
| No. Participants Vaccinated                     | 196                 |
| Mean Predicted Survival Probability, % (95% CI) | 66.7 (55.3 to 77.6) |
| <b><i>Children (Aged 1-3 Years)</i></b>         |                     |
| No. Participants Vaccinated                     | 142                 |
| Mean Predicted Survival Probability, % (95% CI) | 82.6 (75.1 to 89.8) |

This analysis was based on the pooled data of participants vaccinated with Ad26.ZEBOV, MVA-BN-Filo in a 56-day interval in five clinical studies (EBL2001, EBL2002, EBL3001, EBL3002, and EBL3003) using a logistic regression model based on data from NHPs vaccinated with the Ad26.ZEBOV, MVA-BN-Filo vaccine regimen in a 56-day interval.

CI = confidence interval; FAS = full analysis set; NHP = non-human primate; PLWH = people living with human immunodeficiency virus.

**Supplementary Table 5. NHP Immunogenicity Data Used to Construct the Logistic Regression Models**

| Study       | NHP ID | Vaccine regimen                   | Survival | Log10-transformed ELISpot values | Log10-transformed neutralizing antibody levels | Interval       | EIA EU/mL (Q <sup>2</sup> Solutions) |
|-------------|--------|-----------------------------------|----------|----------------------------------|------------------------------------------------|----------------|--------------------------------------|
| C25 study 1 | 33375  | Negative control                  | 0        | 2.176091259                      | 1.612711821                                    | 8 wks interval | 13.62                                |
| C25 study 1 | 33376  | Negative control                  | 0        | 2.176091259                      | 1.719853949                                    | 8 wks interval | 65.26                                |
| C25 study 1 | 33368  | Ad26.Filo, Ad26.Filo, MVA-BN-Filo | 1        | 2.787106093                      | 3.717161306                                    | 4 wks interval | 38179.84                             |
| C25 study 1 | 33378  | Ad26.Filo, Ad26.Filo, MVA-BN-Filo | 1        | 2.761551989                      | 3.70737418                                     | 4 wks interval | 48517.12                             |
| C25 study 1 | 33377  | Ad26.Filo, Ad35.Filo              | 1        | 2.846646329                      | 3.882220733                                    | 8 wks interval | 33186.56                             |
| C25 study 1 | 33379  | Ad26.Filo, Ad35.Filo              | 1        | 2.917768002                      | 4.033223785                                    | 8 wks interval | 46296.32                             |
| C25 study 1 | 33370  | Ad26.Filo, MVA-BN-Filo            | 1        | 3.260667537                      | 4.329461544                                    | 8 wks interval | 137661.44                            |
| C25 study 1 | 33373  | Ad26.Filo, MVA-BN-Filo            | 1        | 2.790636962                      | 3.595020254                                    | 8 wks interval | 26231.04                             |
| C25 study 1 | 33369  | Ad26.ZEBOV, Ad35.ZEBOV            | 1        | 2.703291378                      | 3.604767719                                    | 4 wks interval | 50081.28                             |
| C25 study 1 | 33381  | Ad26.ZEBOV, Ad35.ZEBOV            | 1        | 2.996730515                      | 4.059543297                                    | 4 wks interval | 1854.96                              |
| C25 study 1 | 33367  | MVA-BN-Filo, Ad26.Filo            | 1        | 3.049218023                      | 3.676326078                                    | 8 wks interval | 53881.60                             |
| C25 study 1 | 33380  | MVA-BN-Filo, Ad26.Filo            | 1        | 3.051152522                      | 3.826830847                                    | 8 wks interval | 33576.96                             |
| C29 study 1 | 34187  | Ad26.ZEBOV, MVA-BN-Filo High      | 1        | 2.806179974                      |                                                | 4 wks interval | 20382.72                             |
| C29 study 1 | 34188  | Ad26.ZEBOV, MVA-BN-Filo Standard  | 1        | 3.128722284                      | 3.62951451                                     | 8 wks interval | 18321.92                             |
| C29 study 1 | 34189  | Ad26.ZEBOV, MVA-BN-Filo High      | 1        | 3.16879202                       |                                                | 8 wks interval | 93045.76                             |
| C29 study 1 | 34190  | MVA-BN-Filo, Ad26.ZEBOV, Standard | 1        | 2.750122527                      |                                                | 4 wks interval | 16321.28                             |
| C29 study 1 | 34191  | Ad26.ZEBOV, MVA-BN-Filo Standard  | 1        | 3.070960916                      | 3.322506765                                    | 4 wks interval | 14128.64                             |
| C29 study 1 | 34192  | Negative control                  | 0        | 2.176091259                      | 1.486421977                                    | 8 wks interval | 13.62                                |
| C29 study 1 | 34193  | Ad26.ZEBOV, MVA-BN-Filo High      | 1        | 3.331427297                      | 3.765026397                                    | 8 wks interval |                                      |
| C29 study 1 | 34194  | MVA-BN-Filo, Ad26.ZEBOV, Standard | 1        | 2.966141733                      | 2.468064504                                    | 4 wks interval | 11255.04                             |
| C29 study 1 | 34195  | Ad26.ZEBOV, MVA-BN-Filo High      | 0        | 3.239924813                      | 2.812390753                                    | 4 wks interval | 3935.36                              |
| C29 study 1 | 34196  | Ad26.ZEBOV, MVA-BN-Filo Standard  | 1        | 2.849726444                      | 3.507578563                                    | 8 wks interval | 10766.08                             |
| C29 study 1 | 34197  | Ad26.ZEBOV, MVA-BN-Filo High      | 1        | 2.70969387                       | 3.017056348                                    | 4 wks interval | 10600.32                             |
| C29 study 1 | 34198  | Ad26.ZEBOV, MVA-BN-Filo High      | 1        | 3.202079441                      | 3.864612695                                    | 8 wks interval | 42483.20                             |
| C29 study 1 | 34199  | Ad26.ZEBOV, MVA-BN-Filo Standard  | 1        | 2.924279286                      | 3.06867111                                     | 4 wks interval | 18609.92                             |
| C29 study 1 | 34200  | Ad26.ZEBOV, MVA-BN-Filo Standard  | 1        | 2.730378469                      | 3.786337055                                    | 8 wks interval | 22927.36                             |



| Study       | NHP ID | Vaccine regimen                   | Survival | Log10-transformed ELISpot values | Log10-transformed neutralizing antibody levels | Interval       | EIA EU/mL (Q <sup>2</sup> Solutions) |
|-------------|--------|-----------------------------------|----------|----------------------------------|------------------------------------------------|----------------|--------------------------------------|
| C29 study 1 | 34201  | Ad26.ZEBOV, MVA-BN-Filo High      | 1        | 3.193124598                      | 4.267634548                                    | 8 wks interval | 84992.00                             |
| C29 study 1 | 34202  | Negative control                  | 0        | 2.176091259                      | 1.653890449                                    | 8 wks interval | 14.95                                |
| C29 study 1 | 34203  | Ad26.ZEBOV, MVA-BN-Filo High      | 0        | 2.515211304                      | 2.191784293                                    | 4 wks interval | 11066.88                             |
| C29 study 1 | 34204  | Ad26.ZEBOV, MVA-BN-Filo Standard  | 1        | 3.325310372                      | 3.521504241                                    | 8 wks interval |                                      |
| C29 study 1 | 34205  | MVA-BN-Filo, Ad26.ZEBOV, Standard | 0        | 2.511883361                      | 3.253652174                                    | 4 wks interval | 12994.56                             |
| C29 study 1 | 34206  | MVA-BN-Filo, Ad26.ZEBOV, Standard | 0        | 2.72427587                       | 2.958800268                                    | 4 wks interval | 19605.12                             |
| C29 study 2 | AE868G | MVA-BN-Filo, Ad26.Filo            | 0        | 2.612783857                      | 2.89740945                                     | 4 wks interval | 11706.88                             |
| C29 study 2 | AF805H | Negative control                  | 0        | 2.176091259                      | 1.602059991                                    | 8 wks interval | 13.62                                |
| C29 study 2 | AG556G | Ad26.Filo, MVA-BN-Filo            | 1        | 2.877946952                      | 3.023466837                                    | 4 wks interval | 15871.36                             |
| C29 study 2 | AH258I | MVA-BN-Filo, Ad26.Filo            | 1        | 2.799340549                      | 2.243952826                                    | 4 wks interval | 14274.56                             |
| C29 study 2 | AH649H | MVA-BN-Filo, Ad26.Filo            | 1        | 2.384711743                      | 3.866968847                                    | 8 wks interval | 27779.84                             |
| C29 study 2 | AJ388H | MVA-BN-Filo, Ad26.Filo            | 0        | 2.669781615                      | 2.727248945                                    | 4 wks interval | 8709.76                              |
| C29 study 2 | AK65E  | Negative control                  | 0        | 2.176091259                      | 1.78503071                                     | 8 wks interval | 26.41                                |
| C29 study 2 | AK681G | MVA-BN-Filo, Ad26.Filo            | 1        | 2.730378469                      | 3.543247321                                    | 8 wks interval | 22190.72                             |
| C29 study 2 | AL599B | Ad26.Filo, MVA-BN-Filo            | 1        | 2.912487761                      | 3.804277376                                    | 8 wks interval | 71605.76                             |
| C29 study 2 | AL655C | MVA-BN-Filo, Ad26.Filo            | 1        | 2.568201724                      | 3.533695154                                    | 8 wks interval | 15663.36                             |
| C29 study 2 | AL852D | Ad26.Filo, MVA-BN-Filo            | 0        | 2.505149978                      | 3.271348228                                    | 4 wks interval | 38620.16                             |
| C29 study 2 | AP10B  | Ad26.Filo, MVA-BN-Filo            | 0        | 2.393575203                      | 3.308047627                                    | 8 wks interval | 36921.60                             |
| C29 study 2 | BF318D | MVA-BN-Filo, Ad26.Filo            | 0        | 2.46612587                       | 3.094283639                                    | 8 wks interval | 8479.36                              |
| C29 study 2 | F057   | Ad26.Filo, MVA-BN-Filo            | 1        | 2.943247125                      | 3.312513233                                    | 8 wks interval | 21986.56                             |
| C29 study 2 | F299   | Ad26.Filo, MVA-BN-Filo            | 1        | 2.772688355                      | 3.576253665                                    | 4 wks interval | 38686.72                             |
| C29 study 2 | F364   | MVA-BN-Filo, Ad26.Filo            | 0        | 2.278753601                      | 2.770349338                                    | 4 wks interval | 8381.12                              |
| C29 study 2 | GA707C | Ad26.Filo, MVA-BN-Filo            | 1        | 2.384711743                      | 3.586925079                                    | 4 wks interval | 37102.08                             |
| C29 study 2 | GA951A | Ad26.Filo, MVA-BN-Filo            | 1        | 2.807873132                      | 3.68257919                                     | 8 wks interval | 24189.44                             |
| Study 12    | 33649  | Ad26.ZEBOV, Ad35.ZEBOV            | 0        | 2.565257343                      | 3.151701773                                    | 4 wks interval | 15683.20                             |
| Study 12    | 33650  | Ad26.ZEBOV, MVA-BN-Filo           | 1        | 3.256477206                      | 3.735457731                                    | 6 wks interval | 15290.88                             |
| Study 12    | 33651  | Negative control                  | 0        | 2.176091259                      | 1.756295232                                    | 4 wks interval | 13.62                                |
| Study 12    | 33653  | Ad26.ZEBOV, MVA-BN-Filo           | 1        | 3.248586244                      | 3.215538825                                    | 4 wks interval | 15482.24                             |
| Study 12    | 33656  | Ad26.ZEBOV, MVA-BN-Filo           | 1        | 2.944482672                      | 3.836061136                                    | 6 wks interval | 26946.56                             |
| Study 12    | 33657  | Ad26.ZEBOV, MVA-BN-Filo           | 1        | 2.176091259                      | 3.682650505                                    | 6 wks interval | 18748.16                             |

| Study    | NHP ID | Vaccine regimen                                               | Survival | Log10-transformed ELISpot values | Log10-transformed neutralizing antibody levels | Interval       | EIA EU/mL (Q <sup>2</sup> Solutions) |
|----------|--------|---------------------------------------------------------------|----------|----------------------------------|------------------------------------------------|----------------|--------------------------------------|
| Study 12 | 33659  | Negative control                                              | 0        | 2.176091259                      | 1.639352993                                    | 4 wks interval | 13.62                                |
| Study 12 | 33660  | Ad26.ZEBOV, MVA-BN-Filo                                       | 0        | 2.890700398                      | 3.446599775                                    | 6 wks interval | 13573.12                             |
| Study 12 | 33661  | Ad26.ZEBOV, MVA-BN-Filo                                       | 1        | 2.317018101                      | 3.308632252                                    | 6 wks interval | 11045.76                             |
| Study 12 | 33663  | Ad26.ZEBOV, MVA-BN-Filo                                       | 1        | 2.511883361                      | 3.296823591                                    | 4 wks interval | 11267.20                             |
| Study 12 | 33664  | Ad26.ZEBOV, Ad35.ZEBOV                                        | 0        | 2.176091259                      | 3.519731861                                    | 4 wks interval | 29786.24                             |
| Study 12 | 33665  | Ad26.ZEBOV, Ad35.ZEBOV                                        | 1        | 3.499687083                      | 3.666426292                                    | 4 wks interval | 24327.68                             |
| Study 12 | 33666  | Ad26.ZEBOV, MVA-BN-Filo                                       | 0        | 2.967313918                      | 2.185020291                                    | 4 wks interval | 2364.72                              |
| Study 12 | 33668  | Ad26.ZEBOV, Ad35.ZEBOV                                        | 1        | 2.505149978                      | 3.921773487                                    | 4 wks interval | 49247.36                             |
| Study 12 | 33671  | Ad26.ZEBOV, MVA-BN-Filo                                       | 0        | 2.662757832                      | 3.760051856                                    | 4 wks interval | 31722.88                             |
| Study 12 | 33672  | Ad26.ZEBOV, MVA-BN-Filo                                       | 0        | 2.734399743                      | 3.555083948                                    | 4 wks interval | 8568.00                              |
| C29#8    | 35994  | Ad26.ZEBOV 5x10 <sup>10</sup> , MVA-BN-Filo 1x10 <sup>8</sup> | 1        | 2.727337888                      | 4.764179475                                    | 8 wks interval | 34311.68                             |
| C29#8    | 35995  | Ad26.ZEBOV 5x10 <sup>9</sup> , MVA-BN-Filo 1x10 <sup>8</sup>  | 1        | 2.777245526                      | 5.280194049                                    | 8 wks interval | 42926.08                             |
| C29#8    | 35996  | Ad26.ZEBOV 1x10 <sup>11</sup> , MVA-BN-Filo 5x10 <sup>8</sup> | 1        | 3.40419206                       | 4.968745204                                    | 8 wks interval | 23527.68                             |
| C29#8    | 35997  | Ad26.ZEBOV 2x10 <sup>10</sup> , MVA-BN-Filo 1x10 <sup>8</sup> | 1        | 2.665111737                      | 5.04305995                                     | 8 wks interval | 36779.52                             |
| C29#8    | 35998  | Ad26.ZEBOV 2x10 <sup>10</sup> , MVA-BN-Filo 1x10 <sup>8</sup> | NA*      | 3.053558592                      |                                                | 8 wks interval |                                      |
| C29#8    | 35999  | Ad26.ZEBOV 2x10 <sup>9</sup> , MVA-BN-Filo 1x10 <sup>8</sup>  | 1        | 2.644684718                      | 3.54590189                                     | 8 wks interval | 12476.16                             |
| C29#8    | 36000  | Ad26.ZEBOV 5x10 <sup>10</sup> , MVA-BN-Filo 1x10 <sup>8</sup> | 1        | 3.170994702                      | 4.963829352                                    | 8 wks interval | 48532.48                             |
| C29#8    | 36001  | Ad26.ZEBOV 5x10 <sup>9</sup> , MVA-BN-Filo 1x10 <sup>8</sup>  | 1        | 3.061169643                      | 4.899346632                                    | 8 wks interval | 48396.80                             |
| C29#8    | 36002  | Ad26.ZEBOV 5x10 <sup>10</sup> , MVA-BN-Filo 1x10 <sup>8</sup> | 1        | 2.923632533                      | 4.911622836                                    | 8 wks interval | 24368.64                             |
| C29#8    | 36003  | Negative control                                              | 0        | 2                                | 1.602059991                                    | 8 wks interval | 13.62                                |
| C29#8    | 36004  | Ad26.ZEBOV 2x10 <sup>10</sup> , MVA-BN-Filo 1x10 <sup>8</sup> | 1        | 2.423245874                      | 5.157637564                                    | 8 wks interval | 51074.56                             |
| C29#8    | 36005  | Ad26.ZEBOV 5x10 <sup>10</sup> , MVA-BN-Filo 1x10 <sup>8</sup> | 1        | 3.424268947                      | 4.707695452                                    | 8 wks interval | 21962.24                             |
| C29#8    | 36006  | Ad26.ZEBOV 5x10 <sup>10</sup> , MVA-BN-Filo 1x10 <sup>8</sup> | 1        | 2.986211716                      | 4.888383741                                    | 8 wks interval | 56125.44                             |
| C29#8    | 36007  | Ad26.ZEBOV 1x10 <sup>11</sup> , MVA-BN-Filo 5x10 <sup>8</sup> | 1        | 2                                | 4.96361881                                     | 8 wks interval | 46389.76                             |
| C29#8    | 36008  | Ad26.ZEBOV 5x10 <sup>10</sup> , MVA-BN-Filo 1x10 <sup>8</sup> | 1        | 2.498310554                      | 4.805240662                                    | 8 wks interval | 19074.56                             |
| C29#8    | 36009  | Ad26.ZEBOV 5x10 <sup>9</sup> , MVA-BN-Filo 1x10 <sup>8</sup>  | 1        | 2.197280558                      | 4.762880093                                    | 8 wks interval | 32757.76                             |
| C29#8    | 36010  | Ad26.ZEBOV 5x10 <sup>9</sup> , MVA-BN-Filo 1x10 <sup>8</sup>  | 1        | 3.184691431                      | 4.70776823                                     | 8 wks interval | 28006.40                             |
| C29#8    | 36011  | Ad26.ZEBOV 2x10 <sup>9</sup> , MVA-BN-Filo 1x10 <sup>8</sup>  | 1        | 2.751086555                      | 4.678022736                                    | 8 wks interval | 18941.44                             |
| C29#8    | 36012  | Ad26.ZEBOV 2x10 <sup>10</sup> , MVA-BN-Filo 1x10 <sup>8</sup> | 1        | 2.697882909                      | 4.597990704                                    | 8 wks interval | 23884.80                             |
| TO14#1   | C79314 | Ad26.ZEBOV 5x10 <sup>9</sup> , MVA-BN-Filo 1x10 <sup>4</sup>  | 0        |                                  | 2.630240488                                    | 8 wks interval | 1374.04                              |

| Study  | NHP ID | Vaccine regimen                                              | Survival | Log10-transformed ELISpot values | Log10-transformed neutralizing antibody levels | Interval       | EIA EU/mL (Q <sup>2</sup> Solutions) |
|--------|--------|--------------------------------------------------------------|----------|----------------------------------|------------------------------------------------|----------------|--------------------------------------|
| TO14#1 | C79316 | Ad26.ZEBOV 5x10 <sup>8</sup> , MVA-BN-Filo 1x10 <sup>4</sup> | 0        |                                  | 2.10430885                                     | 8 wks interval | 434.49                               |
| TO14#1 | C79332 | Ad26.ZEBOV 5x10 <sup>7</sup> , MVA-BN-Filo 1x10 <sup>4</sup> | 0        |                                  | 1.602059991                                    | 8 wks interval | 310.98                               |
| TO14#1 | C79342 | Ad26.ZEBOV 5x10 <sup>9</sup> , MVA-BN-Filo 1x10 <sup>4</sup> | 0        |                                  | 2.583524543                                    | 8 wks interval | 636.38                               |
| TO14#1 | C79401 | Ad26.ZEBOV 5x10 <sup>9</sup> , MVA-BN-Filo 1x10 <sup>6</sup> | 0        |                                  | 3.787842726                                    | 8 wks interval | 8225.28                              |
| TO14#1 | C79427 | Negative control                                             | 0        |                                  | 1.602059991                                    | 8 wks interval | 13.62                                |
| TO14#1 | C79434 | Ad26.ZEBOV 5x10 <sup>9</sup> , MVA-BN-Filo 1x10 <sup>6</sup> | 0        |                                  | 3.464841371                                    | 8 wks interval | 6783.04                              |
| TO14#1 | C79435 | Ad26.ZEBOV 5x10 <sup>9</sup> , MVA-BN-Filo 1x10 <sup>8</sup> | 1        |                                  | 4.305370934                                    | 8 wks interval | 19376.00                             |
| TO14#1 | C79438 | Ad26.ZEBOV 5x10 <sup>9</sup> , MVA-BN-Filo 1x10 <sup>8</sup> | 1        |                                  | 4.71456581                                     | 8 wks interval | 17000.96                             |
| TO14#1 | C79442 | Ad26.ZEBOV 5x10 <sup>8</sup> , MVA-BN-Filo 1x10 <sup>4</sup> | 0        |                                  | 2.952239564                                    | 8 wks interval | 984.28                               |
| TO14#1 | C79456 | Negative control                                             | 0        |                                  | 1.602059991                                    | 8 wks interval | 13.62                                |
| TO14#1 | C79459 | Ad26.ZEBOV 5x10 <sup>7</sup> , MVA-BN-Filo 1x10 <sup>4</sup> | 0        |                                  | 1.602059991                                    | 8 wks interval | 13.62                                |
| TO14#1 | C79714 | Ad26.ZEBOV 5x10 <sup>9</sup> , MVA-BN-Filo 1x10 <sup>6</sup> | 0        |                                  | 4.003884038                                    | 8 wks interval | 5187.84                              |
| TO14#1 | C79717 | Ad26.ZEBOV 5x10 <sup>9</sup> , MVA-BN-Filo 1x10 <sup>6</sup> | 1        |                                  | 3.719592225                                    | 8 wks interval | 4112.32                              |
| TO14#1 | C79721 | Ad26.ZEBOV 5x10 <sup>9</sup> , MVA-BN-Filo 1x10 <sup>4</sup> | 0        |                                  | 2.587507798                                    | 8 wks interval | 504.21                               |
| TO14#1 | C79722 | Ad26.ZEBOV 5x10 <sup>9</sup> , MVA-BN-Filo 1x10 <sup>8</sup> | 1        |                                  | 4.623746025                                    | 8 wks interval | 23872.96                             |
| TO14#1 | C79730 | Ad26.ZEBOV 5x10 <sup>9</sup> , MVA-BN-Filo 1x10 <sup>8</sup> | 1        |                                  | 5.093564781                                    | 8 wks interval | 42112.00                             |
| TO14#1 | C79740 | Ad26.ZEBOV 5x10 <sup>9</sup> , MVA-BN-Filo 1x10 <sup>4</sup> | 0        |                                  | 3.106839949                                    | 8 wks interval | 1687.60                              |
| TO14#1 | C79742 | Ad26.ZEBOV 5x10 <sup>7</sup> , MVA-BN-Filo 1x10 <sup>4</sup> | 0        |                                  | 1.602059991                                    | 8 wks interval | 13.62                                |
| TO14#1 | C79743 | Ad26.ZEBOV 5x10 <sup>9</sup> , MVA-BN-Filo 1x10 <sup>4</sup> | 1        |                                  | 2.960086402                                    | 8 wks interval | 1769.44                              |
| TO14#1 | C79745 | Ad26.ZEBOV 5x10 <sup>8</sup> , MVA-BN-Filo 1x10 <sup>4</sup> | 0        |                                  | 2.566905477                                    | 8 wks interval | 1728.00                              |
| TO14#1 | C79746 | Ad26.ZEBOV 5x10 <sup>9</sup> , MVA-BN-Filo 1x10 <sup>6</sup> | 0        |                                  | 4.262159768                                    | 8 wks interval | 9997.76                              |
| TO14#1 | C79748 | Ad26.ZEBOV 5x10 <sup>7</sup> , MVA-BN-Filo 1x10 <sup>4</sup> | 0        |                                  | 1.602059991                                    | 8 wks interval | 407.96                               |
| TO14#1 | C79749 | Ad26.ZEBOV 5x10 <sup>8</sup> , MVA-BN-Filo 1x10 <sup>4</sup> | 0        |                                  | 2.597862949                                    | 8 wks interval | 646.15                               |
| TO14#2 | C72952 | Ad26.ZEBOV 5x10 <sup>9</sup> , MVA-BN-Filo 1x10 <sup>5</sup> | 0        |                                  | 3.291119726                                    | 8 wks interval | 2430.80                              |
| TO14#2 | C75673 | Ad26.ZEBOV 5x10 <sup>9</sup> , MVA-BN-Filo 1x10 <sup>4</sup> | 0        |                                  | 1.942942146                                    | 8 wks interval | 167.62                               |
| TO14#2 | C76102 | Negative control                                             | 0        |                                  | 1.602059991                                    | 8 wks interval | 13.62                                |
| TO14#2 | C76145 | Ad26.ZEBOV 5x10 <sup>9</sup> , MVA-BN-Filo 1x10 <sup>4</sup> | 0        |                                  | 2.612838617                                    | 8 wks interval | 1118.20                              |
| TO14#2 | C76593 | Ad26.ZEBOV 5x10 <sup>9</sup> , MVA-BN-Filo 1x10 <sup>6</sup> | 0        |                                  | 3.784442991                                    | 8 wks interval | 5409.12                              |
| TO14#2 | C77622 | Ad26.ZEBOV 5x10 <sup>9</sup> , MVA-BN-Filo 1x10 <sup>8</sup> | 1        |                                  | 4.827252196                                    | 8 wks interval | 54090.24                             |
| TO14#2 | C79138 | Ad26.ZEBOV 5x10 <sup>9</sup> , MVA-BN-Filo 1x10 <sup>6</sup> | 0        |                                  | 3.592093511                                    | 8 wks interval | 2640.32                              |

| Study  | NHP ID | Vaccine regimen                                              | Survival | Log10-transformed ELISpot values | Log10-transformed neutralizing antibody levels | Interval       | EIA EU/mL (Q <sup>2</sup> Solutions) |
|--------|--------|--------------------------------------------------------------|----------|----------------------------------|------------------------------------------------|----------------|--------------------------------------|
| TO14#2 | C80688 | Ad26.ZEBOV 5x10 <sup>9</sup> , MVA-BN-Filo 1x10 <sup>4</sup> | 0        |                                  | 2.144335046                                    | 8 wks interval | 453.60                               |
| TO14#2 | C80984 | Ad26.ZEBOV 5x10 <sup>9</sup> , MVA-BN-Filo 1x10 <sup>5</sup> | 0        |                                  | 2.721126496                                    | 8 wks interval | 1122.44                              |
| TO14#2 | C81174 | Ad26.ZEBOV 5x10 <sup>9</sup> , MVA-BN-Filo 1x10 <sup>5</sup> | 0        |                                  | 2.872861239                                    | 8 wks interval | 975.40                               |
| TO14#2 | C81261 | Ad26.ZEBOV 5x10 <sup>9</sup> , MVA-BN-Filo 1x10 <sup>4</sup> | 0        |                                  | 3.102076724                                    | 8 wks interval | 983.16                               |
| TO14#2 | C81876 | Ad26.ZEBOV 5x10 <sup>9</sup> , MVA-BN-Filo 1x10 <sup>5</sup> | 0        |                                  | 2.786801945                                    | 8 wks interval | 526.72                               |
| TO14#2 | C81947 | Ad26.ZEBOV 5x10 <sup>9</sup> , MVA-BN-Filo 1x10 <sup>6</sup> | 0        |                                  | 3.753185478                                    | 8 wks interval | 9158.40                              |
| TO14#2 | C82756 | Ad26.ZEBOV 5x10 <sup>9</sup> , MVA-BN-Filo 1x10 <sup>5</sup> | 0        |                                  | 2.656909947                                    | 8 wks interval | 549.88                               |
| TO14#2 | C82979 | Ad26.ZEBOV 5x10 <sup>9</sup> , MVA-BN-Filo 1x10 <sup>8</sup> | 1        |                                  | 5.108443493                                    | 8 wks interval | 40261.12                             |
| TO14#2 | C83021 | Ad26.ZEBOV 5x10 <sup>9</sup> , MVA-BN-Filo 1x10 <sup>4</sup> | 0        |                                  | 2.454647935                                    | 8 wks interval | 306.16                               |
| TO14#2 | C83420 | Ad26.ZEBOV 5x10 <sup>9</sup> , MVA-BN-Filo 1x10 <sup>6</sup> | 0        |                                  | 3.705153471                                    | 8 wks interval | 4253.12                              |
| TO14#2 | C83678 | Ad26.ZEBOV 5x10 <sup>9</sup> , MVA-BN-Filo 1x10 <sup>5</sup> | 0        |                                  | 2.85245596                                     | 8 wks interval | 1305.60                              |
| TO14#2 | C83733 | Ad26.ZEBOV 5x10 <sup>9</sup> , MVA-BN-Filo 1x10 <sup>4</sup> | 0        |                                  | 3.403831341                                    | 8 wks interval | 1518.52                              |
| TO14#2 | C83904 | Ad26.ZEBOV 5x10 <sup>9</sup> , MVA-BN-Filo 1x10 <sup>5</sup> | 0        |                                  | 3.09093289                                     | 8 wks interval | 1719.20                              |
| TO14#2 | C83924 | Ad26.ZEBOV 5x10 <sup>9</sup> , MVA-BN-Filo 1x10 <sup>5</sup> | 0        |                                  | 3.277086647                                    | 8 wks interval | 1218.48                              |
| TO14#2 | C83985 | Negative control                                             | 0        |                                  | 1.664120886                                    | 8 wks interval | 38.91                                |
| TO14#2 | C84344 | Ad26.ZEBOV 5x10 <sup>9</sup> , MVA-BN-Filo 1x10 <sup>4</sup> | 0        |                                  | 2.285141943                                    | 8 wks interval | 548.48                               |

Cells shaded in gray indicate sample not analyzed.

\*Study C29#8, NHP #35998 was taken out of the study just prior to challenge due to a rash in the groin area.

EIA, enzyme immunoassay; EU, enzyme-linked immunosorbent assay units; NHP, non-human primate; wks, weeks.

**Supplementary Table 6. Immunobridging Sensitivity Analysis Using the Logistic Regression Model Based on NHP Data From All Vaccine Regimens Combined**

|                                                 |                     |
|-------------------------------------------------|---------------------|
| Participants Vaccinated                         | N=764               |
| <b>Sensitivity Analysis</b>                     |                     |
| Mean Predicted Survival Probability, % (95% CI) | 45.6 (34.8 to 55.9) |

CI = confidence interval; NHP = non-human primate; PPI = per-protocol immunogenicity.

This analysis was based on the pooled data of healthy adults (18 to 50 years of age) vaccinated with Ad26.ZEBOV, MVA-BN-Filo in a 56-day interval in five clinical studies (EBL2001, EBL2002, EBL3001, EBL3002, and EBL3003) using the logistic model based on NHP data (N=108) from all vaccine regimens combined.<sup>6</sup> PPI analysis set.

**Supplementary Table 7. EBOV GP Binding Antibody Concentrations (ELISA, EU/mL) at Baseline for the Healthy Adult Data Set in the Five Phase 2/3 Studies**

| Study (Country)              | All Participants |                           | Positive Participants |                                                |
|------------------------------|------------------|---------------------------|-----------------------|------------------------------------------------|
|                              | N                | GMC<br>(95% CI)           | No. (%)               | Binding Antibody<br>Concentrations<br>Min; Max |
| EBL2001 (FRA, UK)            | 222              | <LLOQ<br>(<LLOQ to <LLOQ) | 17 (7.7)              | 40; 694                                        |
| EBL2002 (BFA, CIV, KEN, UGA) | 392              | <LLOQ<br>(<LLOQ to 39)    | 123 (31.4)            | 36; 10,441                                     |
| EBL3001 (SL)                 | 297              | 63<br>(54 to 74)          | 176 (59.3)            | 37; 13,341                                     |

| Study (Country) | All Participants |                           | Positive Participants |                  |
|-----------------|------------------|---------------------------|-----------------------|------------------|
|                 | N                | GMC                       | No. (%)               | Binding Antibody |
|                 |                  | (95% CI)                  |                       | Concentrations   |
|                 |                  |                           |                       | Min; Max         |
| EBL3002 (USA)   | 206              | <LLOQ<br>(<LLOQ to <LLOQ) | 9 (4.4)               | 37; 2444         |
| EBL3003 (USA)   | 301              | <LLOQ<br>(<LLOQ to <LLOQ) | 25 (8.3)              | 37; 2717         |

The analysis is based on the PPI analysis set, including all healthy adults (not restricted to the 18-50 years of age of participants in the immunobridging analysis set). Data from participants receiving active vaccine and placebo/control vaccine are pooled. No. (%): number (percentage) of all participants who were found to be positive in the EBOV GP ELISA at baseline.

BFA = Burkina Faso; CI = confidence interval; CIV = Côte d'Ivoire; EBOV = Ebola virus; EU = enzyme-linked immunosorbent assay units; FAS = full analysis set; FRA = France; GMC = geometric mean concentration; GP = glycoprotein; KEN = Kenya; LLOQ = lower limit of

quantification (36.11 EU/mL); max = maximum; min = minimum; N = number of participants with data; PPI = per-protocol immunogenicity analysis set; SL = Sierra Leone; UGA = Uganda; UK = United Kingdom; USA = United States of America.



**Supplementary Table 8. Number of Healthy Adult (Aged 18-50 Years) Participants in the PPI Analysis Set by Baseline EBOV GP**

**ELISA Level**

|                 |                    | <b>Studies (Countries)</b>   |                                 |                         |                          |                          |
|-----------------|--------------------|------------------------------|---------------------------------|-------------------------|--------------------------|--------------------------|
|                 |                    | <b>EBL2002</b>               |                                 |                         |                          |                          |
|                 |                    | <b>EBL2001<br/>(FRA, UK)</b> | <b>(BFA, CIV,<br/>KEN, UGA)</b> | <b>EBL3001<br/>(SL)</b> | <b>EBL3002<br/>(USA)</b> | <b>EBL3003<br/>(USA)</b> |
| Distribution By | N                  | 45                           | 113                             | 212                     | 135                      | 251                      |
|                 | <LLOQ              | 42 (93.3)                    | 77 (68.1)                       | 84 (39.6)               | 131 (97.0)               | 231 (92.0)               |
| Baseline ELISA  | LLOQ to 100 EU/mL  | 2 (4.4)                      | 15 (13.3)                       | 59 (27.8)               | 2 (1.5)                  | 9 (3.6)                  |
| Level, No. (%)  | >100 to 1000 EU/mL | 1 (2.2)                      | 20 (17.7)                       | 58 (27.4)               | 1 (0.7)                  | 10 (4.0)                 |
|                 | >1000 EU/mL        | 0                            | 1 (0.9)                         | 11 (5.2)                | 1 (0.7)                  | 1 (0.4)                  |

BFA = Burkina Faso; CI = confidence interval; CIV = Côte d'Ivoire; EBOV = Ebola virus; EU = enzyme-linked immunosorbent assay units; FRA = France; GP = glycoprotein; KEN = Kenya; LLOQ = lower limit of quantification (36.11 EU/mL); N = number of participants with data at both baseline and 21 days post-Dose 2 (7 out of 764 participants included in the PPI immunobridging analysis did not have baseline EBOV GP ELISA result); PPI = per-protocol immunogenicity analysis set; SL = Sierra Leone; UGA = Uganda; UK = United Kingdom; USA = United States of America.

### 3. Supplementary References

1. Janssen Vaccines & Prevention B.V. Staged phase 3 study to assess the safety and immunogenicity of Ebola candidate vaccines Ad26.ZEBOV and MVA-BN-Filo (EBOVAC-Salone). ClinicalTrials.gov. NCT02509494.  
<https://clinicaltrials.gov/ct2/show/NCT02509494>. (2022) Accessed August 1, 2022.
2. Pollard, A.J., *et al.* Safety and immunogenicity of a two-dose heterologous Ad26.ZEBOV and MVA-BN-Filo Ebola vaccine regimen in adults in Europe (EBOVAC2): a randomised, observer-blind, participant-blind, placebo-controlled, phase 2 trial. *Lancet Infect Dis* **21**, 493-506 (2021).
3. Ishola, D., *et al.* Safety and long-term immunogenicity of the two-dose heterologous Ad26.ZEBOV and MVA-BN-Filo Ebola vaccine regimen in adults in Sierra Leone: a combined open-label, non-randomised stage 1, and a randomised, double-blind, controlled stage 2 trial. *Lancet Infect Dis* **22**, 97-109 (2022).
4. Barry, H., *et al.* Safety and immunogenicity of 2-dose heterologous Ad26.ZEBOV, MVA-BN-Filo Ebola vaccination in healthy and HIV-infected adults: a randomised, placebo-controlled phase II clinical trial in Africa. *PLoS Med* **18**, e1003813 (2021).
5. Bockstal, V., *et al.* Assessments of different batches and dose levels of a two-dose Ad26.ZEBOV and MVA-BN-Filo vaccine regimen. *NPJ Vaccines* **6**, 157 (2021).
6. Roozendaal, R., *et al.* Nonhuman primate to human immunobridging to infer the protective effect of an Ebola virus vaccine candidate. *NPJ Vaccines* **5**, 112 (2020).
